# Supplementary material for: Atomic-level control of the thermoelectric properties in polytypoid nanowires
Source: Royal Society of Chemistry journal article supplement (doi:10.1039/c0sc00537a), 2011-01-01
Supplement: c0sc00537a.pdf [file c0sc00537a.pdf]

## Atomic-Level Control of the Thermoelectric Properties in Polytypoid Nanowires

Sean C. Andrews<sup>1,2\*</sup>, Melissa A. Fardy<sup>1,2\*</sup>, Michael C. Moore<sup>1,2\*</sup>, Shaul Aloni<sup>2</sup>, Minjuan Zhang<sup>3</sup>, Velimir Radmilovic<sup>2,4</sup>, & Peidong Yang<sup>1,2</sup>

<sup>1</sup>Department of Chemistry, University of California, Berkeley, California 94720.

<sup>2</sup>Materials Science Division, Lawrence Berkeley National Laboratory, Berkeley, California 94720.

<sup>3</sup>Materials Research Department, Toyota Research Institute of North America, Toyota Motor Engineering & Manufacturing North America (TEMA) Inc., 1555 Woodridge Avenue, Ann Arbor, Michigan 48105

<sup>4</sup>National Center for Electron Microscopy, Lawrence Berkeley National Laboratory, Berkeley, California 94720.

\*These authors contributed equally to this work.

## Instrumentation

SEM images were collected using a JEOL JSM 6340F field-emission SEM operating at 5 kV. XRD patterns were collected using a Bruker D8 GADDS diffractometer with Co  $k_{\alpha}$  irradiation and a Bruker D8 Advance diffractometer with Cu  $k_{\alpha}$  irradiation. Individual nanowires were imaged using the following: a Tecnai G2 S-Twin TEM operating at 200 kV, a Technai F20 UT TEM operating at 200 kV, a Philips CM200/FEG TEM operating at 200 kV and a JEOL JEM-2100 LaB<sub>6</sub> TEM operating at 200 kV. Elemental analysis was performed on a Hitachi H-7650 TEM operating at 120 kV equipped with an EDAX EDS. Elemental maps were collected using a JEOL JEM-2100-F field emission analytical TEM operating at 200 kV with a HAADF STEM detector and an Oxford EDS. The Z-contrast STEM images were taken using the transmission electron aberration-corrected microscope (TEAM) 0.5, which consists of a modified

FEI Titan 80-300 microscope equipped with a special high-brightness Schottky-field emission electron source, a gun monochromator, a high-resolution GIF Tridiem energy-filter, and two CEOS hexapole-type spherical aberration correctors, all of which enable 50 pm resolution. The TEAM 0.5 has a HAADF STEM detector and was operated at 300 kV.

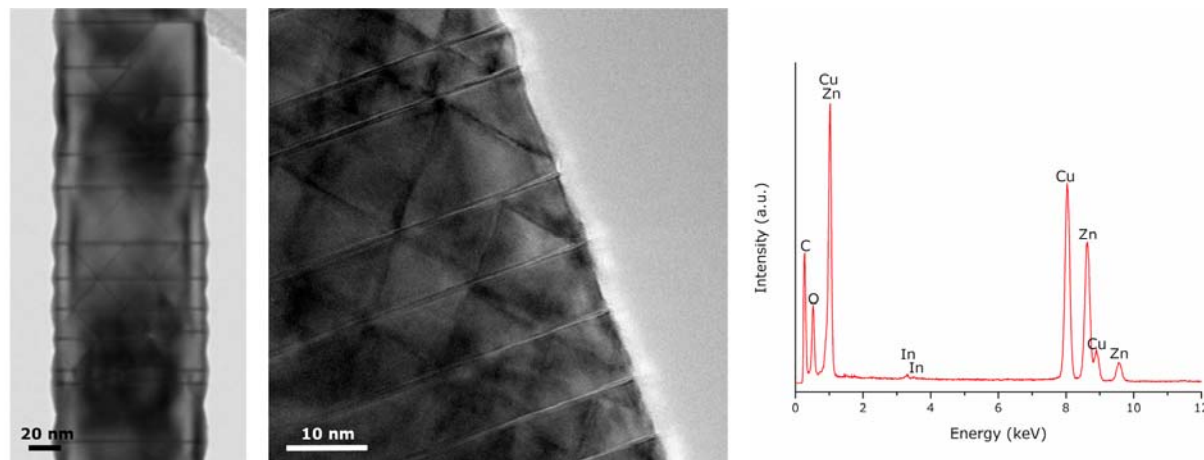

**Figure S1: Indium zinc oxide (IZO) nanowires.** TEM images and EDS spectrum of IZO nanowires prepared by coating ZnO nanowires with 15 nm of In and annealing at 1173 K in oxygen for 12 hours.

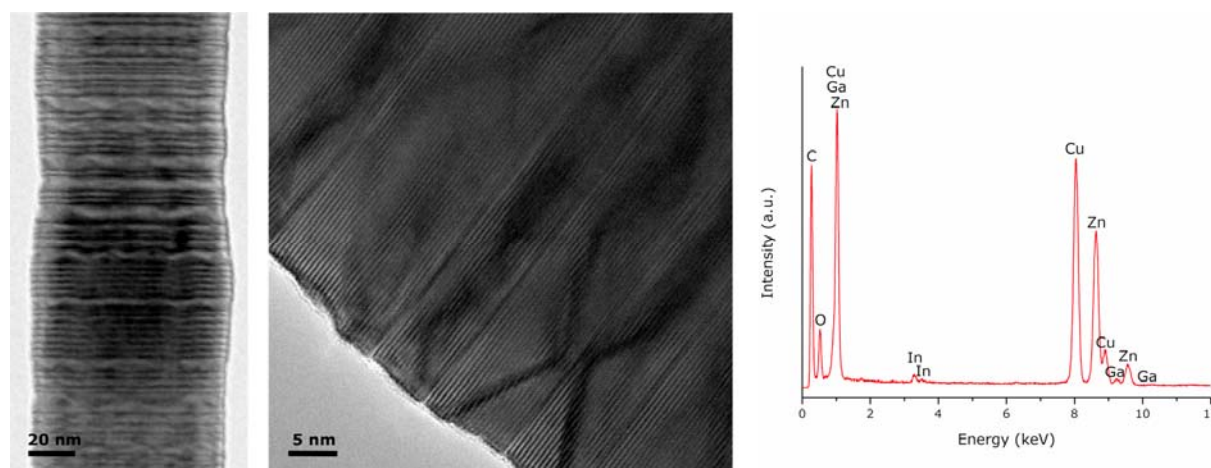

**Figure S2: Indium gallium zinc oxide (IGZO) nanowires.** TEM images and EDS spectrum of IGZO nanowires prepared by coating ZnO nanowires with 10 nm of In and 10 nm of Ga and annealing at 1173 K in oxygen for 12 hours. The In:Ga ratios were approximately 1:1 by EDS in all the nanowires. For example, in the 10/10 IGZO nanowires, the atomic percentages of In, Ga, and Zn in a 110 nm nanowire were 6.3, 6.0, and 87.7, respectively.

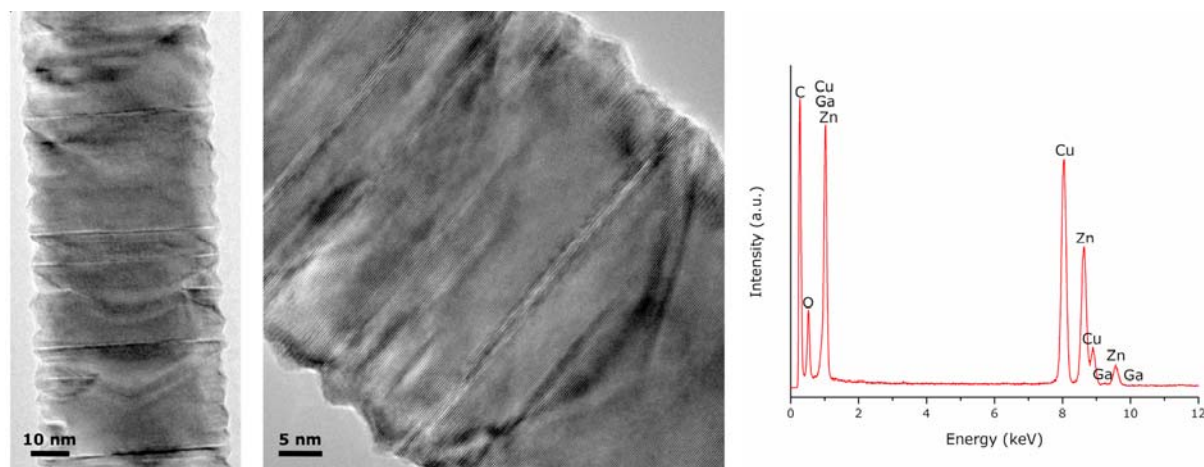

**Figure S3: Gallium zinc oxide (GZO) nanowires.** TEM images and EDS spectrum of GZO nanowires prepared by coating ZnO nanowires with 10 nm of Ga and annealing at 1173 K in oxygen for 12 hours.

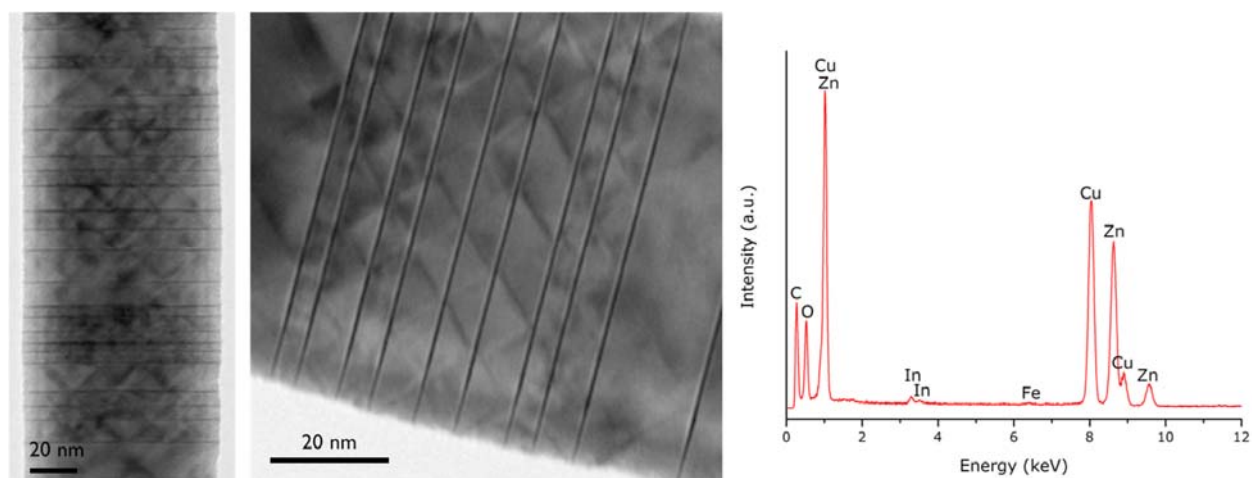

**Figure S4: Indium iron zinc oxide (IFZO) nanowires.** TEM images and EDS spectrum of IFZO nanowires prepared by coating ZnO nanowires with 5 nm of In and 5 nm of Fe and annealing at 1173 K in oxygen for 12 hours.

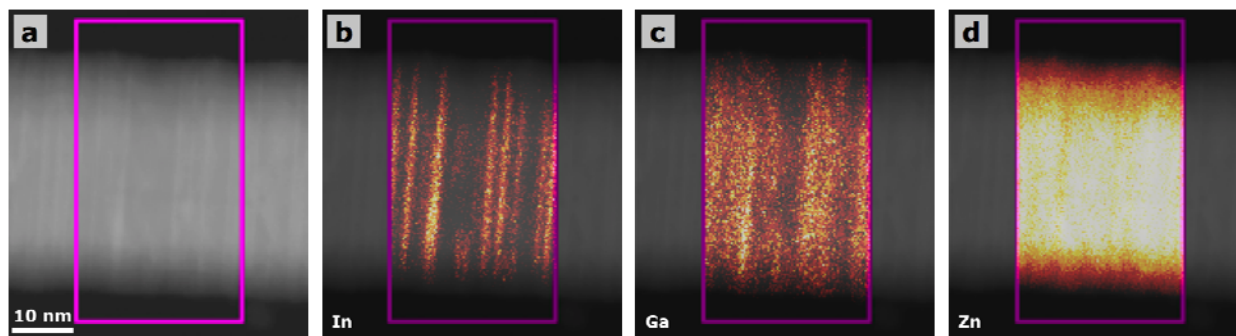

**Figure S5: Elemental mapping.** a, STEM image of an IGZO nanowire and the corresponding EDS element maps for In (b), Ga (c), and Zn (d) overlaid on the original image.

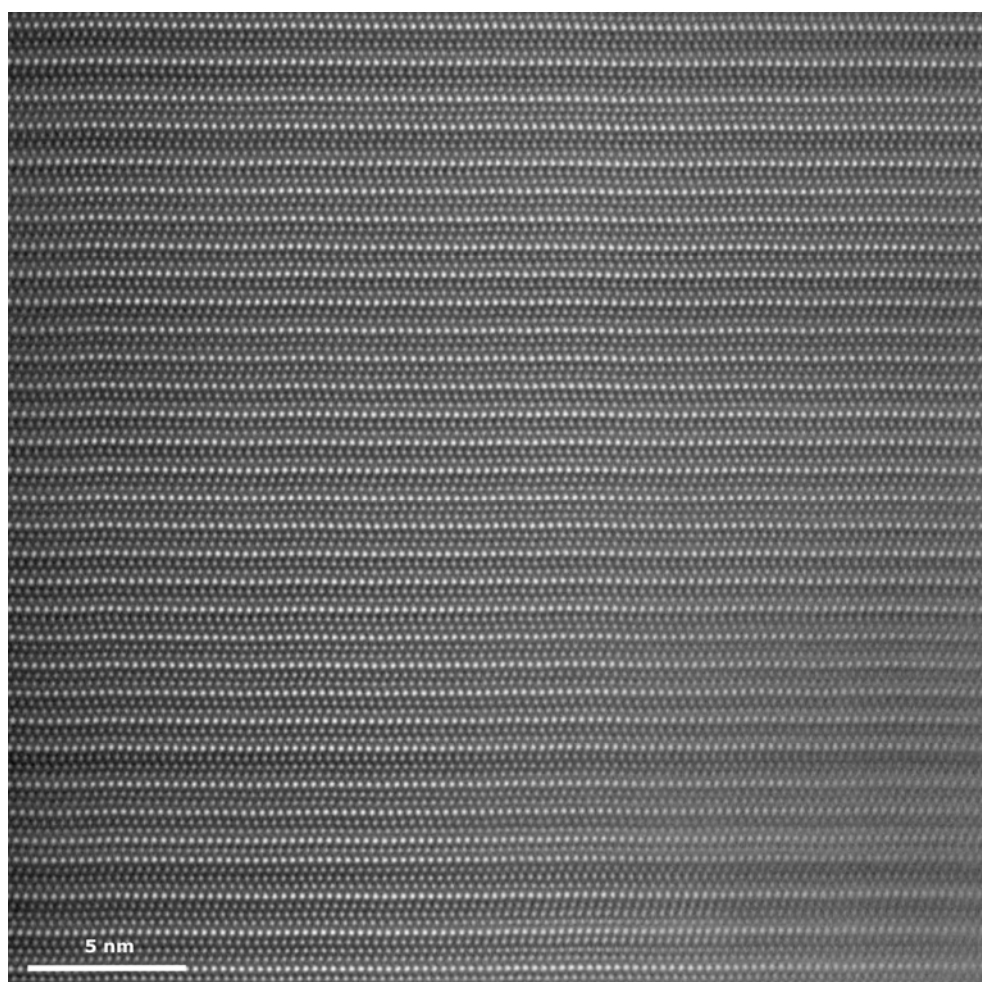

**Figure S6: 40/40 indium gallium zinc oxide nanowires.** Z-contrast STEM image showing a high density of inclusions layers with spacings corresponding to  $n=2$  and  $n=1$ .



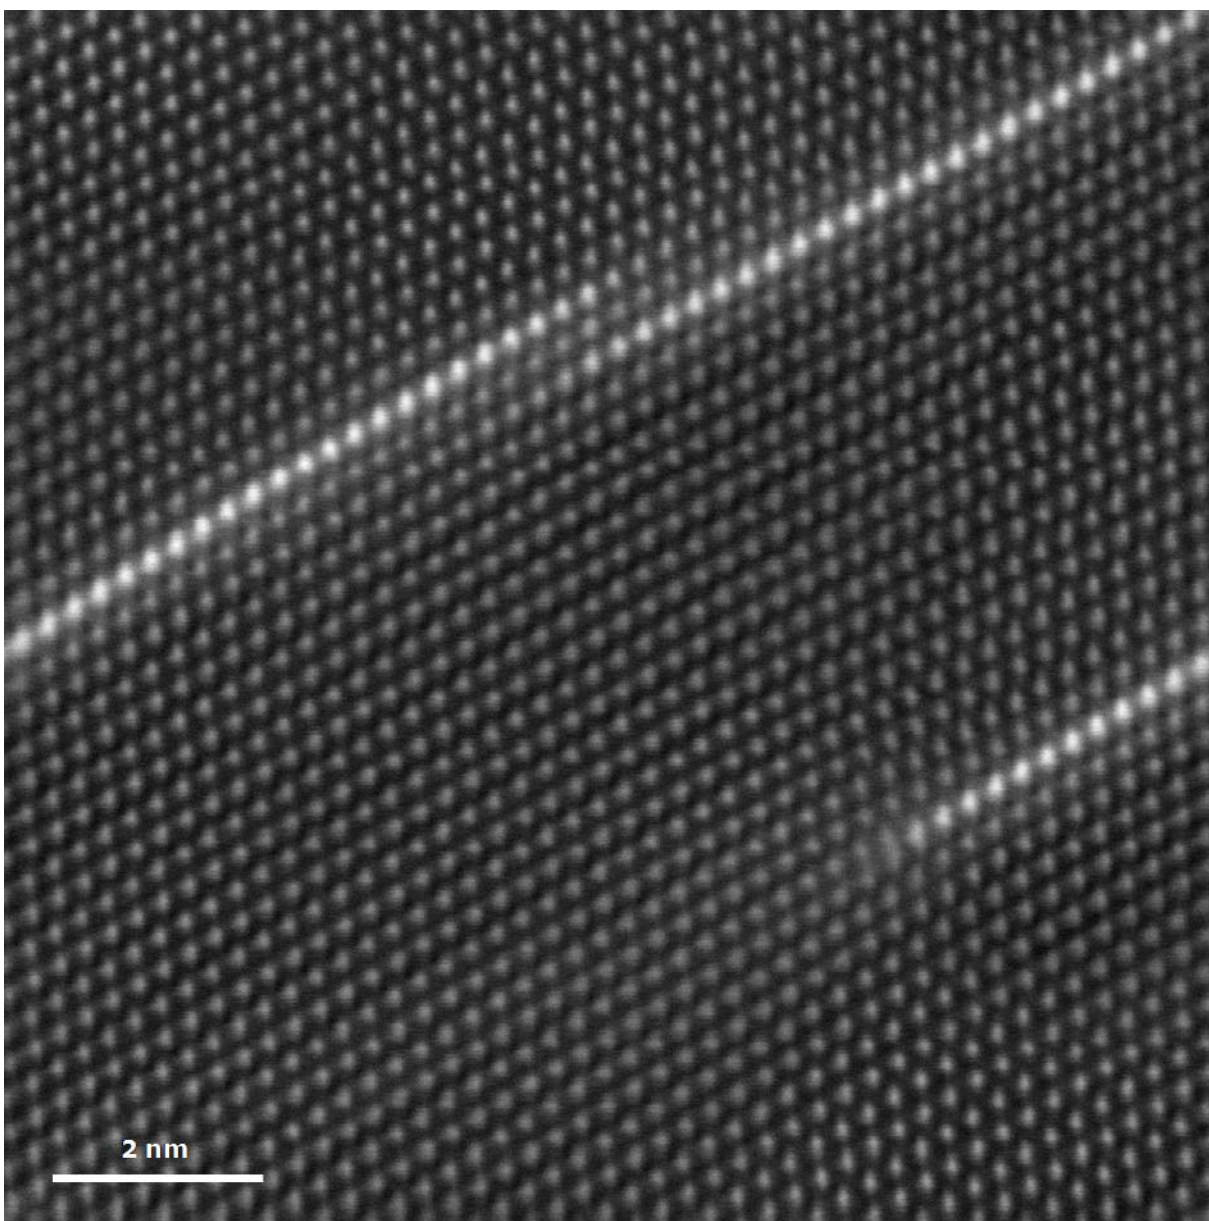

**Figure S7: Partial inclusions merge together.** Z-contrast HRSTEM image of IGZO showing three partial inclusions. The two partial inclusions at the top of the image appear to be merging together via edge dislocation climb to create a single complete inclusion layer.

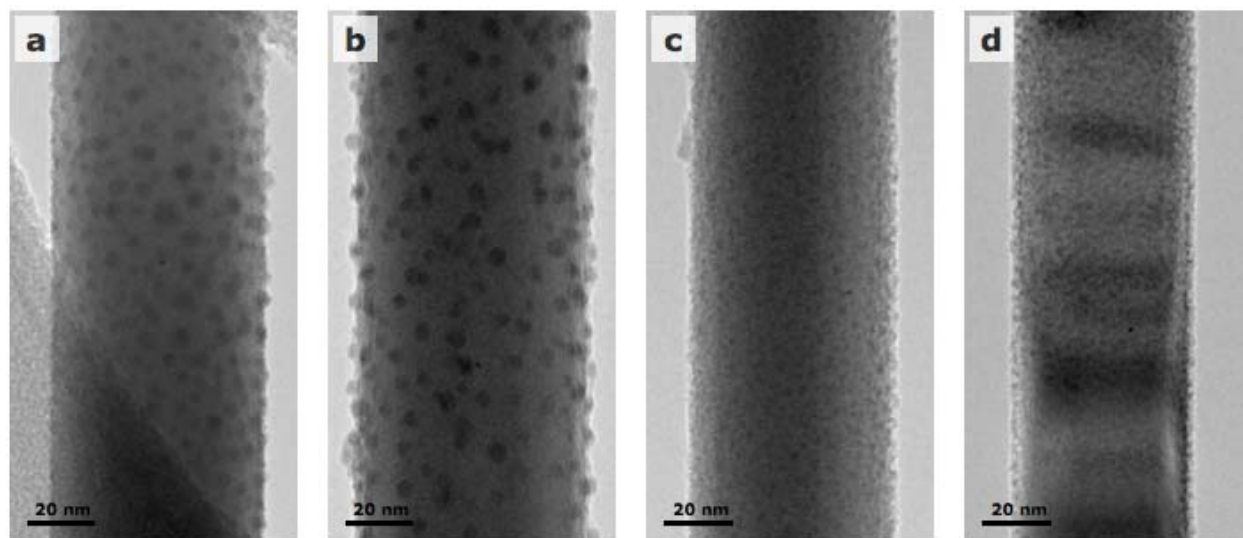

**Figure S8: Pre-annealed TEMs.** ZnO nanowires coated with 5 nm of In and 5 nm of Ga (**a**), 10 nm of In (**b**), 10 nm of Ga (**c**), and 5 nm of In and 5 nm of Fe (**d**)
